# Supplementary material for: Intradermal lipopolysaccharide challenge as an acute in vivo inflammatory model in healthy volunteers
Source: PubMed Central journal article supplement — Br J Clin Pharmacol. 2021 Aug 24;88(2):680–90. doi: 10.1111/bcp.14999 (PMC9290695; doi:10.1111/bcp.14999), 2021-08-24

| Subject | Left arm (saline) | left arm (LPS/untreated skin) | left arm (LPS/untreated skin) | right arm (LPS) | Right arm (LPS) |
|---------|-------------------|-------------------------------|-------------------------------|-----------------|-----------------|
| 1       | 3h SB             | Baseline SB                   | Baseline SPB                  | 3h SB           | 3h SPB          |
| 2       | 3h SB             | Baseline SB                   | Baseline SPB                  | 3h SB           | 3h SPB          |
| 3       | 3h SB             | Baseline SB                   | Baseline SPB                  | 3h SB           | 3h SPB          |
| 4       | 3h SPB            | Baseline SB                   | Baseline SPB                  | 3h SB           | 3h SPB          |
| 5       | 3h SPB            | Baseline SB                   | Baseline SPB                  | 3h SB           | 3h SPB          |
| 6       | 3h SPB            | Baseline SB                   | Baseline SPB                  | 3h SB           | 3h SPB          |
| 7       | 6h SB             | 6h SB                         | 6h SPB                        | 10h SB          | 10h SPB         |
| 8       | 6h SB             | 6h SB                         | 6h SPB                        | 10h SB          | 10h SPB         |
| 9       | 6h SB             | 6h SB                         | 6h SPB                        | 10h SB          | 10h SPB         |
| 10      | 6h SPB            | 6h SB                         | 6h SPB                        | 10h SB          | 10h SPB         |
| 11      | 6h SPB            | 6h SB                         | 6h SPB                        | 10h SB          | 10h SPB         |
| 12      | 6h SPB            | 6h SB                         | 6h SPB                        | 10h SB          | 10h SPB         |
| 13      | 24h SB            | 24h SB                        | 24h SPB                       | 48h SB          | 48h SPB         |
| 14      | 24h SB            | 24h SB                        | 24h SPB                       | 48h SB          | 48h SPB         |
| 15      | 24h SB            | 24h SB                        | 24h SPB                       | 48h SB          | 48h SPB         |
| 16      | 24h SPB           | 24h SB                        | 24h SPB                       | 48h SB          | 48h SPB         |
| 17      | 24h SPB           | 24h SB                        | 24h SPB                       | 48h SB          | 48h SPB         |
| 18      | 24h SPB           | 24h SB                        | 24h SPB                       | 48h SB          | 48h SPB         |

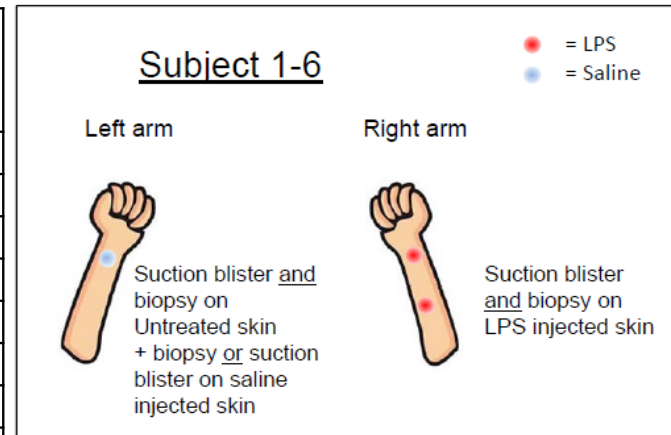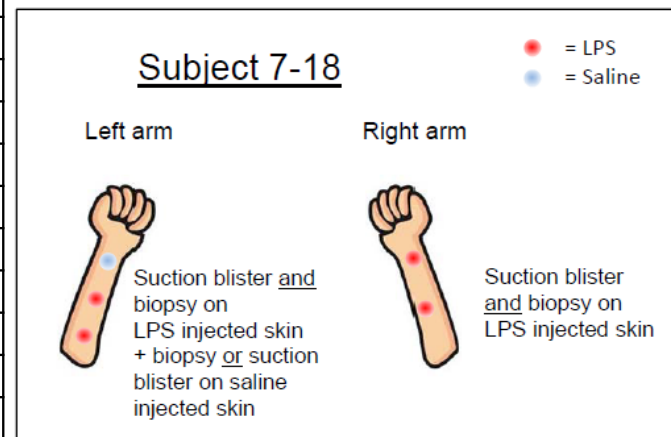

Supplement: BCP-88-680-s001.pdf [file BCP-88-680-s001.pdf]
