# Supplementary figures and images for: Intradermal lipopolysaccharide challenge as an acute in vivo inflammatory model in healthy volunteers
Source: PubMed Central journal article supplement — Br J Clin Pharmacol. 2021 Aug 24;88(2):680–90. doi: 10.1111/bcp.14999 (PMC9290695; doi:10.1111/bcp.14999), 2021-08-24

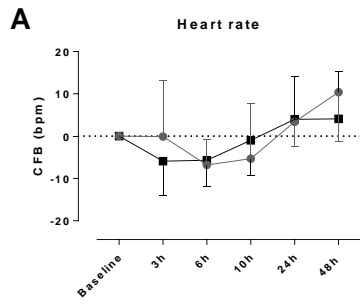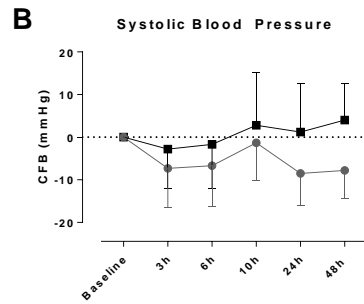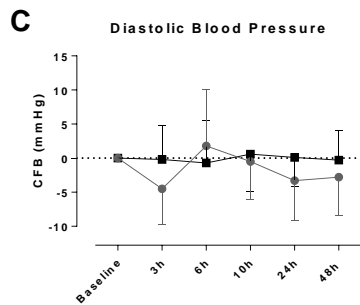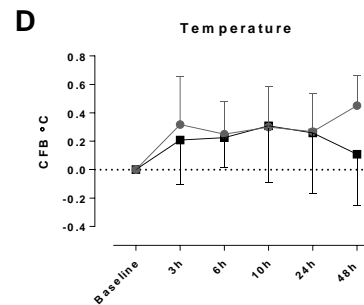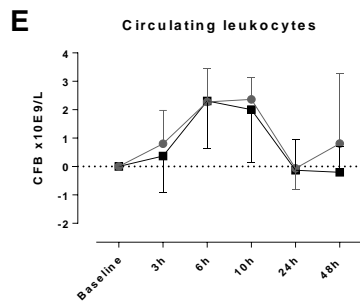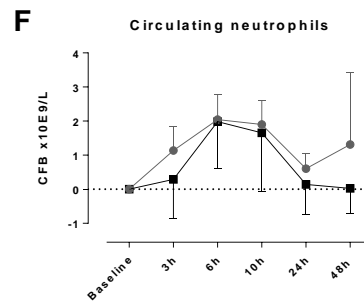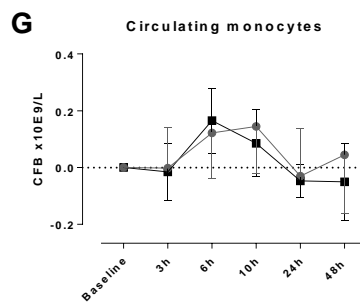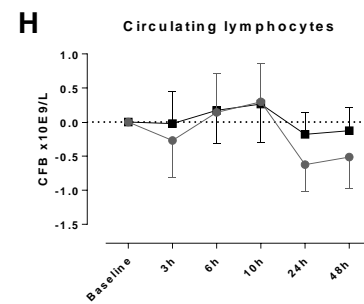

Supplement: BCP-88-680-s003.pdf [file BCP-88-680-s003.pdf]

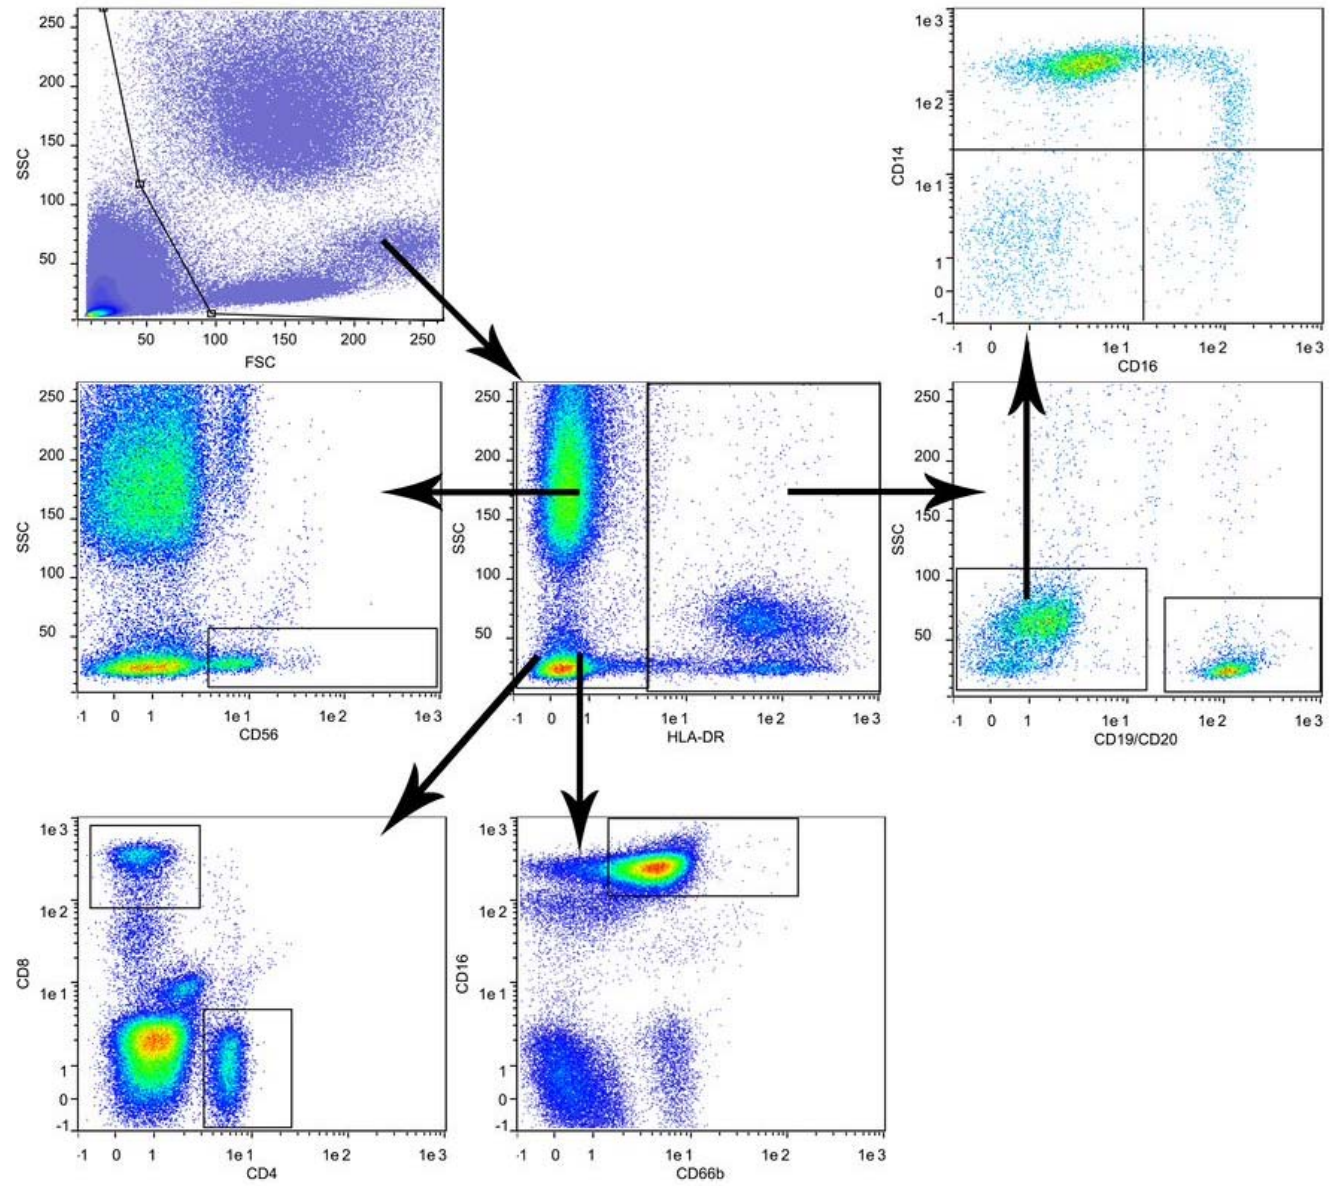

Supplement: BCP-88-680-s004.pdf [file BCP-88-680-s004.pdf]
